# Supplementary material for: Evolution and targeting of Omp85 homologs in the chloroplast outer envelope membrane
Source: Front Plant Sci. 2014 Oct 13;5:535. doi: 10.3389/fpls.2014.00535 (PMC4195282; doi:10.3389/fpls.2014.00535)
Supplement: Table S1 — Sequences used for this study. [file Table1.XLSX]

## Sheet: Sheet1
Group	Organism	Final Name	Database	remarks	Phytozome accession	GI number	Accession number	Other studies
Cyano85	>Anabaena variabilis	>Anabaena variabilis	Genbank			75906319	YP_320615
Cyano85	>Cyanothece sp. ATCC 51142	>Cyanothece51142	Genbank			172037293	YP_001803794	Topel et al., 2012;
Cyano85	>Cyanothece sp. PCC 8802	>Cyanothece8802	Genbank			257058270	YP_003136158
Cyano85	>Gloeobacter violaceus	>Gloeobacter	Genbank			37521432	NP_924809	Topel et al., 2012;
Cyano85	>Gloeocapsa sp. PCC 7428	>Gloeocapsa	Genbank			434393269	YP_007128216
Cyano85	>Microcoleus vaginatus FGP-2	>Microcoleus	Genbank	removed		334117378	ZP_08491469	Topel et al., 2012;
Cyano85	>Microcystis aeruginosa PCC 9717	>Microcystis	Genbank	removed		425441938	ZP_18822201
Cyano85	>Nostoc punctiforme PCC 7107	>Nostoc7107	Genbank			427708370	YP_007050747
Cyano85	>Nostoc punctiforme PCC 7120	>Nostoc7120a	Genbank			17227571	NP_484119	Inoue and Potter, 2004; Moslavac et al., 2005;
Cyano85	>Nostoc punctiforme PCC 7120	>Nostoc7120b	Genbank			17232385	NP_488933	Inoue and Potter, 2004; Moslavac et al., 2005;
Cyano85	>Nostoc punctiforme PCC 7120	>Nostoc7120c	Genbank			17229761	NP_486309	Inoue and Potter, 2004; Moslavac et al., 2005;
Cyano85	>Nostoc punctiforme PCC 73102	>Nostoc73102a	Genbank			186686321	YP_001869517	Inoue and Potter, 2004; Moslavac et al., 2005;
Cyano85	>Nostoc punctiforme PCC 73102	>Nostoc73102b	Genbank			186681903	YP_001865099	Inoue and Potter, 2004; Moslavac et al., 2005;
Cyano85	>Nostoc punctiforme PCC 73102	>Nostoc73102c	Genbank			186683206	YP_001866402	Inoue and Potter, 2004; Moslavac et al., 2005;
Cyano85	>Nostoc punctiforme PCC 73102	>Nostoc73102d	Genbank			186687181	YP_001870324	Inoue and Potter, 2004; Moslavac et al., 2005;
Cyano85	>Oscillatoria sp PCC 6506	>Oscillatoria	Genbank			300334636	CBN57209	Inoue and Potter, 2004; Topel et al., 2012;
Cyano85	>Prochlorococcus marinus str. MIT 9313	>Prochlorococcus marinus 9313	Genbank			33863680	NP_895240	Inoue and Potter, 2004; Moslavac et al., 2005
Cyano85	>Prochlorococcus marinus subsp. marinus str. CCMP1375	>Prochlorococcus marinus 1375	Genbank			33240868	NP_875810	Inoue and Potter, 2004;
Cyano85	>Prochlorococcus marinus subsp. pastoris str. CCMP1986	>Prochlorococcus marinus 1986	Genbank			33640262	CAE19797	Inoue and Potter, 2004; Moslavac et al., 2005
Cyano85	>Synechococcus sp. JA-2-3B'a(2-13)	>Synechococcus sp. JA-2-3B'a(2-13)	Genbank			86608254	YP_477016
Cyano85	>Synechococcus sp. JA-3-3Ab	>Synechococcus sp. JA-3-3Ab	Genbank			86605270	YP_474033
Cyano85	>Synechococcus WH 8102	>Synechococcus8102	Genbank			33865091	NP_896650	Inoue and Potter, 2004; Moslavac et al., 2005
Cyano85	>Synechococcus WH 8109	>Synechococcus8109	Genbank	removed		260435228	ZP_05789198
Cyano85	>Synechocystis sp. PCC 6803	>Synechocystis	Genbank			16330104	NP_440832	Inoue and Potter, 2004; Moslavac et al., 2005
Cyano85	>Thermosynechococcus elongatus BP-1	>Thermosynechococcus	Genbank			22299332	NP_682579	Inoue and Potter, 2004; Topel et al., 2012; Moslavac et al., 2005
Cyano85	>Trichodesmium erythraeum IMS101	>Trichodesmium	Genbank			113478035	YP_724096	Inoue and Potter, 2004; Moslavac et al., 2005
FhaC	>Bordetella pertussis	>BpFhaC	Uniprot			462082	P35077	Inoue and Potter, 2004; Moslavac et al., 2005
OEP80	>Amborella trichopoda	>AtrOEP80a	Genbank			548853776	ERN11759
OEP80	>Aquilegia coerulea	>AcOEP80a	Phytozome		Aquca_020_00282.1/22025756			Topel et al., 2012;
OEP80	>Arabidopsis lyrata	>AlOEP80a	Genbank			297808025	XP_002871896	Topel et al., 2012;
OEP80	>Arabidopsis thaliana	>AtOEP80a	Genbank			18419973	NP_568378	Inoue and Potter, 2004; Topel et al., 2012;
OEP80	>Brachypodium distachyon	>BdOEP80a	Genbank			357139374	XP_003571257	Topel et al., 2012;
OEP80	>Clamydomonas reinhardtii	>CrOEP80	Genbank			159473843	XP_001695043	Topel et al., 2012;
OEP80	>Coccomyxa subellipsoidea C-169	>CsOEP80	Genbank			545368045	XP_005648812
OEP80	>Glycine max	>GmOEP80a	Genbank	updated		356547291=>571503006	XP_003542049	Inoue and Potter, 2004;
OEP80	>Hordeum vulgare	>HvOEP80a	Genbank			326508096	BAJ86791	Inoue and Potter, 2004;
OEP80	>Marchantia polymorpha	>MpOEP80	Marchantia genome			From contact|CUFF.46.1|Locus5727v1rpkm45.25|Isotig24604
OEP80	>Medicago truncatula	>MtOEP80a	Genbank			357454321	XP_003597441
OEP80	>Micromonas pusilla CCMP1545	>MpuOEP80	Genbank			303284771	XP_003061676
OEP80	>Nitella mirabilis	>NmiOEP80	Genbank	nucleotide		389347153	JV768272		TSA
OEP80	>Oryza sativa	>OsOEP80a	Phytozome		Os02g10260	209573140	A2X208	Inoue and Potter, 2004; Topel et al., 2012;
OEP80	>Ostreococcus lucimarinus CCE9901	>OlOEP80	Genbank			145352166	XP_001420427
OEP80	>Physcomitrella patens	>PpOEP80	Phytozome		Phpat.003G014600.1.p/Pp1s1_532V6			Inoue and Potter, 2004; Topel et al., 2012;
OEP80	>Picea glauca	>PgOEP80	Genbank	nucleotide		270152816	BT119702
OEP80	>Pinus taeda	>PtaOEP80	Congenie			UCPtaeda_isotig45956		Inoue and Potter, 2004;
OEP80	>Pisum sativum	>PsOEP80	Genbank	nucleotide		332462779, 583854942, 583855031	JI929836, GAMJ01062906, GAMJ01062819		TSA
OEP80	>Populus trichocarpa	>PtOEP80a	Genbank			224075788	XP_002304768	Topel et al., 2012;
OEP80	>Pseudotsuga menziesii	>PmOEP80	Genbank	nucleotide		451295138	GAEK01016123
OEP80	>Selaginella moellendorffii	>SmOEP80a	Genbank			302764336	XP_002965589	Topel et al., 2012;
OEP80	>Selaginella moellendorffii	>SmOEP80b	Genbank			302769300	XP_002968069	Topel et al., 2012;
OEP80	>Solanum lycopersicum	>SlOEP80a	Genbank			460410942	XP_004250874	Inoue and Potter, 2004;
OEP80	>Sorghum bicolor	>SbOEP80a	Genbank			242064374	XP_002453476
OEP80	>Volvox carteri	>VcOEP80	Phytozome		Vocar20015282m/23132615			Topel et al., 2012;
OEP80	>Zea mays	>ZmOEP80a	Phytozome		GRMZM2G028005	212275868	NP_001130755	Inoue and Potter, 2004; Topel et al., 2012;
OEP80tr	>Amborella trichopoda	>AtrOEP80b	Genbank			548830762	ERM93685		Positions 1-168 removed
OEP80tr	>Aquilegia coerulea	>AcOEP80b	Phytozome		Aquca_009_00677.1/22034791			Topel et al., 2012;
OEP80tr	>Arabidopsis lyrata	>AlOEP80b	Genbank			297818880	XP_002877323	Topel et al., 2012;
OEP80tr	>Arabidopsis thaliana	>AtOEP80b	Genbank			42565501	NP_190002	Topel et al., 2012;
OEP80tr	>Arabidopsis thaliana	>AtOEP80c	Genbank			332644917	AEE78438	Topel et al., 2012;
OEP80tr	>Brachypodium distachyon	>BdOEP80b	Genbank			357133054	XP_003568143	Topel et al., 2012;
OEP80tr	>Glycine max	>GmOEP80b	Genbank			356550060	XP_003543408
OEP80tr	>Hordeum vulgare	>HvOEP80b	Genbank			326528873	BAJ97458
OEP80tr	>Medicago truncatula	>MtOEP80b	Genbank			357453267	XP_003596910
OEP80tr	>Oryza sativa	>OsOEP80b	Genbank			115464815	NP_001056007	Inoue and Potter, 2004; Topel et al., 2012;
OEP80tr	>Pisum sativum	>PsOEP80tr	Genbank	nucleotide		332436422	JI903479
OEP80tr	>Populus trichocarpa	>PtOEP80b	Genbank			224106696	XP_002314252
OEP80tr	>Solanum lycopersicum	>SlOEP80b	Genbank			460411653	XP_004251220
OEP80tr	>Sorghum bicolor	>SbOEP80b	Genbank			242091043	XP_002441354
OEP80tr	>Zea mays	>ZmOEP80b	Genbank			194697226	ACF82697	Inoue and Potter, 2004; Topel et al., 2012;
Omp84	>Escherichia coli	>EcBamA	Uniprot			71164818	P0A940	Inoue and Potter, 2004; Moslavac et al., 2005
Omp85	>Neisseria meningitidis	>NmOmp85	Uniprot			75340943	O30912	Inoue and Potter, 2004; Moslavac et al., 2005	15929538
Sam50	>Saccharomyces cerevisiae	>ScSam50	Uniprot			1730715	P53969 SV	Inoue and Potter, 2004; Moslavac et al., 2005
TamA	>Escherichia coli	>EcTamA	Uniprot			83288425	P0ADE4	Inoue and Potter, 2004;
Tob55	>Neurospora crassa	>NcTob55	Uniprot			45758781	Q6PYX0(AAS76651 )	Inoue and Potter, 2004; Moslavac et al., 2005
Toc75	>Amborella trichopoda	>atrToc75	Genbank			548849067	ERN07972
Toc75	>Aquilegia coerulea	>acToc75	Phytozome		Aquca_003_00131.1/22049373			Topel et al., 2012;
Toc75	>Arabidopsis lyrata	>alToc75a	Genbank			297819256	XP_002877511	Topel et al., 2012;
Toc75	>Arabidopsis thaliana	>atToc75a	Genbank			15232625	NP_190258	Inoue and Potter, 2004;Topel et al., 2012;
Toc75	>Brachypodium distachyon	>bdToc75a	Genbank			357112912	XP_003558249	Topel et al., 2012;
Toc75	>Brachypodium distachyon	>bdToc75b	Phytozome		Bradi4g25730.2			Topel et al., 2012;
Toc75	>Clamydomonas reinhardtii	>crToc75	Phytozome		Cre03.g175200			Topel et al., 2012;
Toc75	>Coccomyxa subellipsoidea C-169	>csToc75	Genbank			545370332	XP_005649815
Toc75	>Cyanidioschyzon merolae	>cmToc75	Genbank			449016918	BAM80320	Topel et al., 2012;
Toc75	>Galdieria sulphuraria	>gsToc75	Genbank			545701862	XP_005703263	Topel et al., 2012;
Toc75	>Glycine max	>GmToc75	Genbank			356557408	XP_003547008	Inoue and Potter, 2004;
Toc75	>Hordeum vulgare subsp. Vulgare	>hvToc75	Genbank			326506018	BAJ91248	Inoue and Potter, 2004;
Toc75	>Marchantia polymorpha	>mpToc75	Marchantia genome			From contact|CUFF.8669.8
Toc75	>Medicago truncatula	>MtToc75	Genbank			357472869	XP_003606719	Inoue and Potter, 2004;
Toc75	>Micromonas pusilla CCMP1545	>mpuToc75	Genbank			303281122	XP_003059853
Toc75	>Nitella mirabilis	>nmiToc75	Genbank	nucleotide		389348205	JV769324		TSA
Toc75	>Oryza sativa	>osToc75a	Phytozome		Os03g16440	108707416	ABF95211	Inoue and Potter, 2004; Topel et al., 2012; Moslavac et al., 2005
Toc75	>Oryza sativa	>osToc75b	Phytozome		Os11g02460	108863937	ABA91235	Inoue and Potter, 2004; Topel et al., 2012; Moslavac et al., 2006
Toc75	>Ostreococcus lucimarinus CCE9901	>olToc75	Genbank			145343539	XP_001416377
Toc75	>Physcomitrella patens	>ppToc75a	Phytozome		Phpat.006G037000.1.p/Pp1s317_51V6.1			Topel et al., 2012;
Toc75	>Physcomitrella patens	>ppToc75b	Phytozome		Phpat.007G089600.1.p/Pp1s2_62V6.1			Topel et al., 2012;
Toc75	>Physcomitrella patens	>ppToc75c	Phytozome		Phpat.005G085600.1.p/Pp1s23_111V6			Topel et al., 2012;
Toc75	>Picea glauca	>pgToc75	Genbank	nucleotide		Assembled from: 70614790, 157571324, 157589298, 157641084
Toc75	>Pinus Taeda	>ptaToc75	Congenie	nucleotide		UCPtaeda_isotig40601
Toc75	>Pisum sativum	>psToc75	Genbank			576507	AAA53275	Inoue and Potter, 2004; Topel et al., 2012;
Toc75	>Populus trichocarpa	>ptToc75	Genbank			224057882	XP_002299371	Inoue and Potter, 2004;
Toc75	>Pseudotsuga menziesii	>pmToc75	Genbank	nucleotide		598136155	GAZW01279330
Toc75	>Selaginella moellendorffii	>smToc75	Phytozome			270688		Topel et al., 2012;
Toc75	>Solanum lycopersicum	>slToc75	Genbank			460391204	XP_004241213	Inoue and Potter, 2004;
Toc75	>Sorghum bicolor	>sbToc75	Genbank			242041439	XP_002468114
Toc75	>Volvox carteri	>vcToc75	Phytozome		Vocar20007822m/23138876			Topel et al., 2012;
Toc75	>Zea mays	>zmToc75	Phytozome		GRMZM2G001918	414866058	DAA44615	Inoue and Potter, 2004; Topel et al., 2012; Moslavac et al., 2005
Toc75-I	>Arabidopsis lyrata	>alToc75c	Genbank			297793479	XP_002864624	Topel et al., 2012;
Toc75-I	>Arabidopsis thaliana	>atToc75c	Genbank	psudogene		332193711	AEE31832	Topel et al., 2012;
Toc75-IV	>Arabidopsis lyrata	>alToc75b	Genbank			297809083	XP_002872425	Topel et al., 2012;
Toc75-IV	>Arabidopsis thaliana	>atToc75b	Genbank			79466902	NP_192647	Inoue and Potter, 2004; Topel et al., 2012;
